# Supplementary material for: TGF-β1-Mediated PD-L1 Glycosylation Contributes to Immune Escape via c-Jun/STT3A Pathway in Nasopharyngeal Carcinoma
Source: PubMed Central journal article supplement (PMC8930841; doi:10.3389/fonc.2022.815437), 2022-03-04
Supplement: DataSheet_1.pdf [file DataSheet_1.pdf]

**Supplementary Table 1.** Short-hairpin (shRNA) sequences used in this study

| <b>ID</b>    | <b>5'</b>      | <b>stem</b>               | <b>loop</b> | <b>stem</b>               | <b>3'</b>  |
|--------------|----------------|---------------------------|-------------|---------------------------|------------|
| CD274-RNAi-a | Ccgg           | ACCATCAAGTCCTGA<br>GTGGTA | CTCGAG      | TACCACTCAGGACTT<br>GATGGT | TTTT<br>Tg |
| CD274-RNAi-b | aattcaaaa<br>a | ACCATCAAGTCCTGA<br>GTGGTA | CTCGAG      | TACCACTCAGGACTT<br>GATGGT |            |
| JUN-RNAi-a   | Ccgg           | AAGATGGAAACGACC<br>TTCTAT | CTCGAG      | ATAGAAGGTCGTTTC<br>CATCTT | TTTT<br>Tg |
| JUN-RNAi-b   | aattcaaaa<br>a | AAGATGGAAACGACC<br>TTCTAT | CTCGAG      | ATAGAAGGTCGTTTC<br>CATCTT |            |
| STT3A-RNAi-a | Ccgg           | cgCAGCAAGTTGAATC<br>CACAA | CTCGAG      | TTGTGGATTCAACTT<br>GCTGCG | TTTT<br>Tg |
| STT3A-RNAi-b | aattcaaaa<br>a | cgCAGCAAGTTGAATC<br>CACAA | CTCGAG      | TTGTGGATTCAACTT<br>GCTGCG |            |
